# Supplementary material for: The Fluctuations of Leukocytes and Circulating Cytokines in Septic Humanized Mice Vary With Outcome
Source: Front Immunol. 2019 Jun 26;10:1427. doi: 10.3389/fimmu.2019.01427 (PMC6607920; doi:10.3389/fimmu.2019.01427)
Supplement: Supplementary file 1 [file Data_Sheet_1.docx]

**ONLINE SUPPLEMENT**

**The Fluctuations of Leukocytes and Circulating Cytokines in Septic Humanized Mice Vary with Outcome.**

Tomasz Skirecki1, Susanne Drechsler2, Grażyna Hoser1, Mohammad Jafarmadar2, Katarzyna Siennicka3, Zygmunt Pojda3, Jerzy Kawiak1, Marcin F. Osuchowski2*

1 Laboratory of Flow Cytometry, Centre of Postgraduate Medical Education, Warsaw, Poland

2Ludwig Boltzmann Institute for Experimental and Clinical Traumatology in the AUVA Research Center, Vienna, Austria

3Department of Cell Engineering, Maria Sklodowska-Curie Memorial Cancer Center and Institute of Oncology, Warsaw, Poland

**Supplemental Table 1**. **Human immune cells development eight weeks after transplantation of the umbilical cord blood CD34+ cells.**

| Lineage | Bone marrow [median] | Spleen  [median] | Peripheral blood  [median] |
| --- | --- | --- | --- |
| CD20+ B cells [%] | 35.5 | 24.6 | 38.5 |
| CD3+ T cells [%] | 1.1 | 6.7 | 1.4 |
| CD14+ monocytes [%] | 28.7 | 14.2 | 4.9 |

**Supplemental Table 2. Frequency of human CD45+ cells in the bone marrow of humanized mice sacrificed after CLP.**

| **Mouse** | **BM hCD45 [%]** |
| --- | --- |
| **1** | 56.6 |
| **3** | 23.9 |
| **4** | 18.3 |
| **6** | 42.6 |
| **7** | 33.6 |
| **9** | 53.9 |
| **11** | 55.1 |
| **12** | 39.8 |
| **13** | 40.7 |
| **14** | 53.7 |
| **15** | 18.9 |
| **19** | 68.6 |
| **23** | 27.3 |
| **24** | 25.4 |
| **26** | 35.4 |
| **27** | 64.4 |
| **28** | 82.8 |
| **29** | 19.9 |
| **30** | 26.6 |

**Supplemental Figure 1. Survival graphs of two CLP runs on humanized NSG mice.**

**Supplemental Figure 2. Comparison of all body temperature measurements in P-DIE and P-SUR mice.**

**Supplemental Figure 3. Correlation coeffcients of human cytokines 6 hours after CLP with the expression of CD80 on human splenic monocytes at the time of death.** Concentration of human plasma cytokines was correlated with the geometric mean fluorescence (GMF) of anti-CD80 staining of human monocytes in the spleens of septic mice (24-32 hours after CLP). Pearson correlation values are marked on the graphs. A. CD80 GMF vs TNF; B. CD80 GMF vs IL-6; C. CD80 GMF vs IL-8; D. CD80 GMF vs IL-10; E. CD80 GMF vs MCP-1.
